# Supplementary material for: Fragile skin microbiomes in megacities are assembled by a predominantly niche-based process
Source: PubMed Central journal article supplement — Sci Adv. 2018 Mar 7;4(3):e1701581. doi: 10.1126/sciadv.1701581 (PMC5842045; doi:10.1126/sciadv.1701581), 2018-03-07
Supplement: 1701581_SM.pdf [file 1701581_SM.pdf]

## Supplementary Materials for

### **Fragile skin microbiomes in megacities are assembled by a predominantly niche-based process**

Hye-Jin Kim, Hanbyul Kim, Jin Ju Kim, Nu Ri Myeong, Taeyune Kim, Taehun Park, Eunjoo Kim, Ji-yei Choi, Johnhwan Lee, Susun An, Woo Jun Sul

Published 7 March 2018, *Sci. Adv.* **4**, e1701581 (2018)  
DOI: 10.1126/sciadv.1701581

#### **The PDF file includes:**

- fig. S1. Information of the geographical location and characteristics of each city.
- fig. S2. Relative mean abundances of four predominant phyla.
- fig. S3. Mean relative abundance of bacterial genera in the skin microbiome among the five cities in China.
- fig. S4. Principal coordinate analysis with weighted UniFrac distances.
- fig. S5. Distance decay analysis.
- fig. S6. The  $\beta$ -diversity comparisons of the skin microbiome of the five cities.
- fig. S7. Distribution of PD.
- fig. S8. Analysis of MSE by random forest modeling.
- fig. S9. Comparison of predicted functional metagenomic profiling using PICRUSt between the megacity and non-megacity groups.
- fig. S10. The richness (observed OTUs) of the genus *Staphylococcus* in five cities.
- table S1. Sample metadata, number of sequences, and  $\alpha$  diversity across samples based on rarefaction of 4860 reads per sample.
- table S2. Relative average abundances of the 15 most abundant genera.
- table S3. Environmental factors and city indices of five cities.
- table S4. Environmental factors and city indices of five cities.
- table S5. The observed species pool of five cities.
- Legend for data file S1

**Other Supplementary Material for this manuscript includes the following:**  
(available at [advances.sciencemag.org/cgi/content/full/4/3/e1701581/DC1](https://advances.sciencemag.org/cgi/content/full/4/3/e1701581/DC1))

- data file S1 (Microsoft Excel format). The information of OTUs in Fig. 3A.

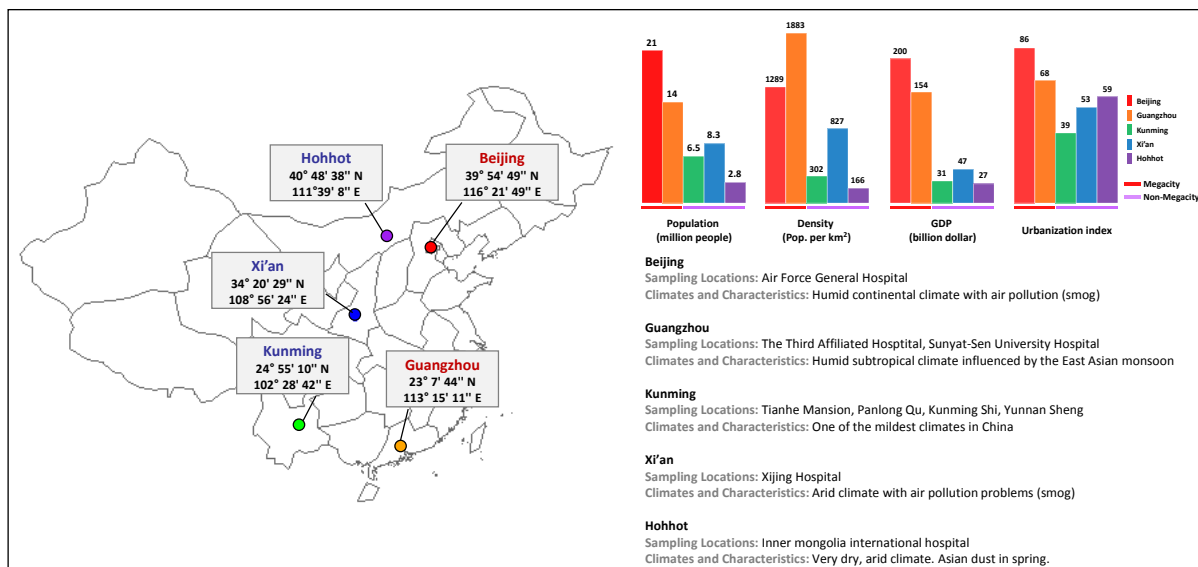

**fig. S1. Information of the geographical location and characteristics of each city.** Sampling was performed at selected hospitals and at licensed offices. The five large cities are located at least 409 km apart from each other, vary in their climatic conditions, and differ in their city indices such as population size, population density, GDP, and urbanization.

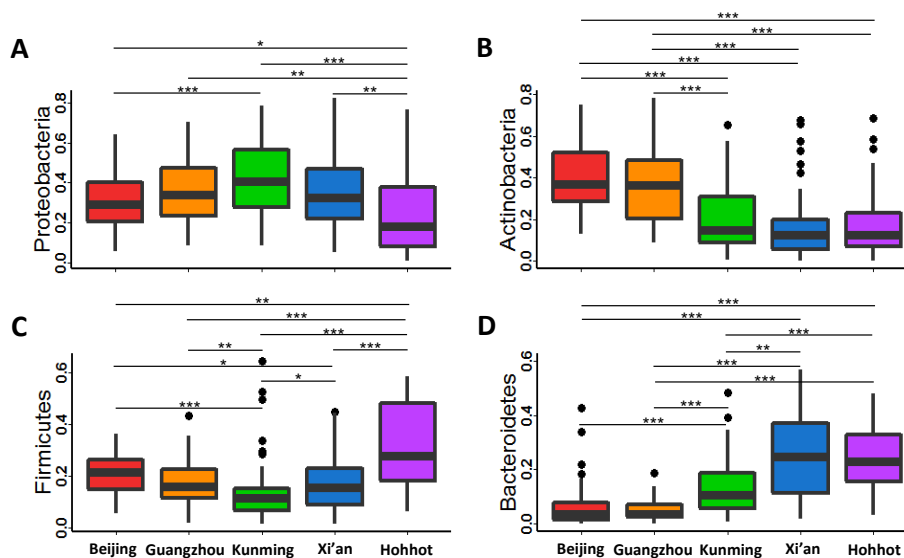

**fig. S2. Relative mean abundances of four predominant phyla.** On each graph, an asterisk indicates a significant difference in relative abundances (\*\* $P < 0.001$ , \*\* $P < 0.01$ , \* $P < 0.05$ , Wilcoxon rank sum test [Kruskal–Wallis test]).

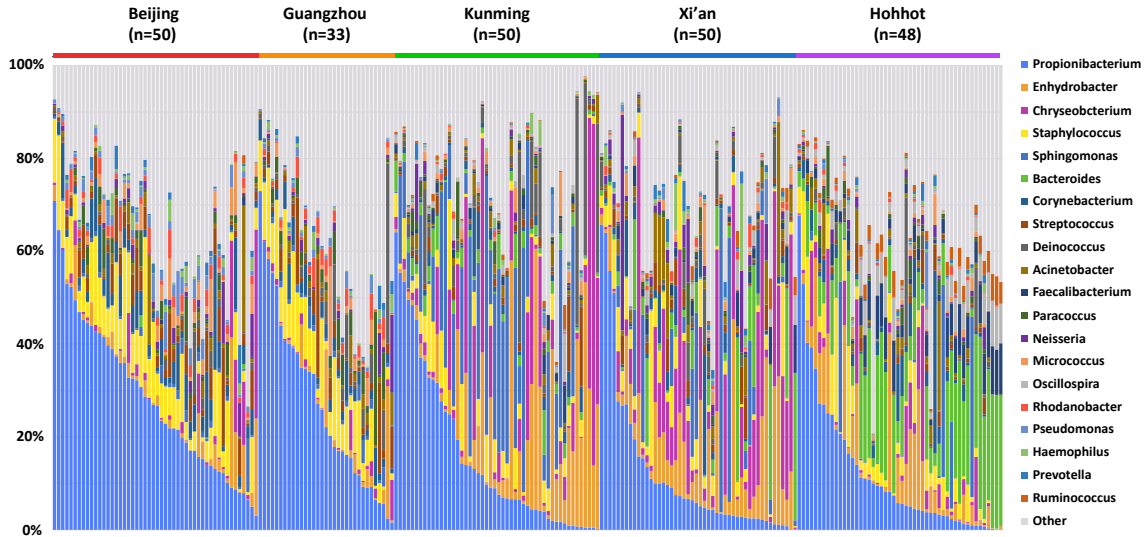

**fig. S3. Mean relative abundance of bacterial genera in the skin microbiome among the five cities in China.** The mean relative abundances of the top 20 genera show differences between the compositions of megacity and non-megacity skin microbiomes. Especially, *Propionibacterium* and *Staphylococcus* were more abundant in megacities than non-megacities, and *Bacteroides* was the most abundant genus in Hohhot (see table S2).

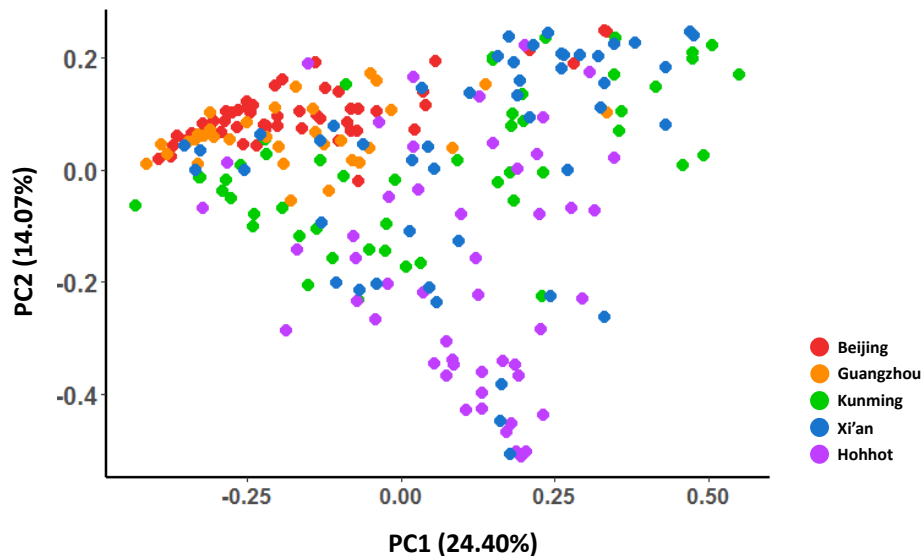

**fig. S4. Principal coordinate analysis with weighted UniFrac distances.** Principal coordinate analysis derived from the weighted UniFrac distance metrics based on the 97%-similar OTUs of the bacterial community compositions across five cities ( $R^2 = 0.26$ ,  $P < 0.001$ , analysis of similarity).

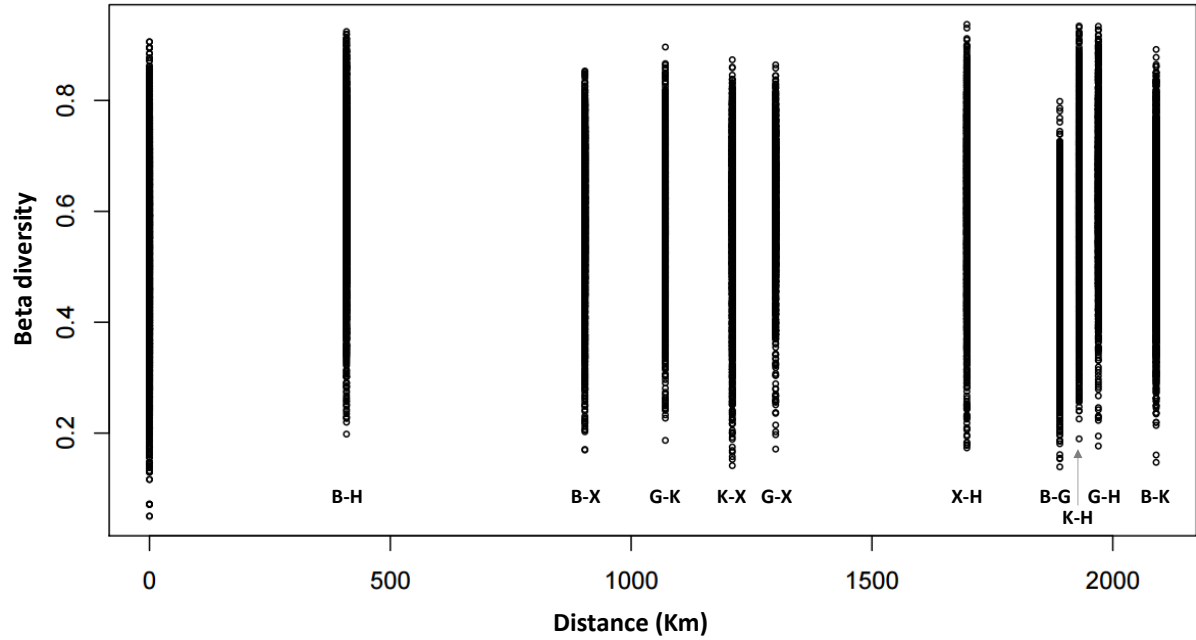

**fig. S5. Distance decay analysis.** The distance between cities is at least 409 km (Beijing to Hohhot) and the maximum is 2090 km (Beijing to Kunming), and there was no distance decay relationship among all five cities. The  $\beta$ -diversities among the samples belonging to each city were calculated as weighted UniFrac distance metrics. Capital letters in the graph indicate each city (B: Beijing, G: Guangzhou, K: Kunming, X: Xi'an, and H: Hohhot).

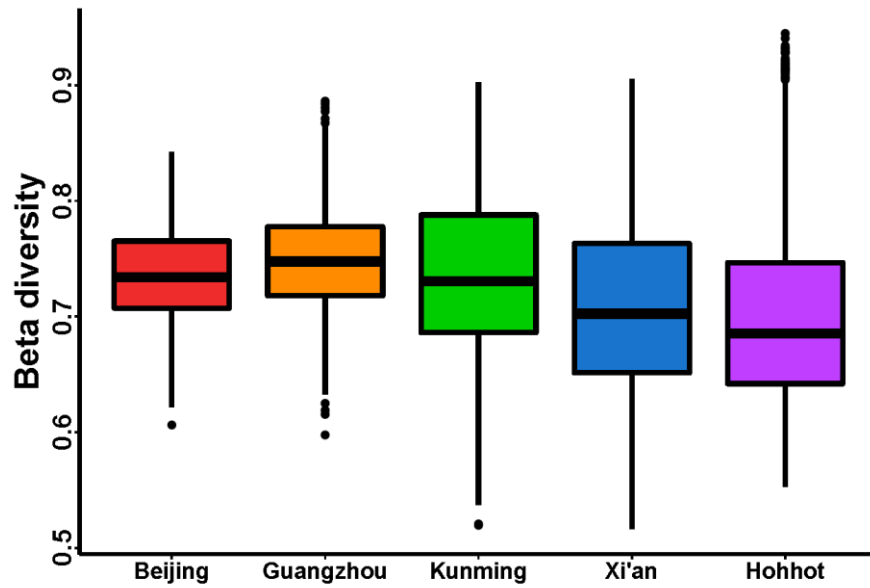

**fig. S6. The  $\beta$ -diversity comparisons of the skin microbiome of the five cities.** Beta diversity between the samples belonging to each city was calculated as unweighted UniFrac distance metrics. The black line and whiskers in the boxplot represent the mean and range of minimum and maximum alpha diversity values. The beta-diversity of each city was significantly different ( $P = 0.001$ ,  $R^2 = 0.47$ , ANOSIM).

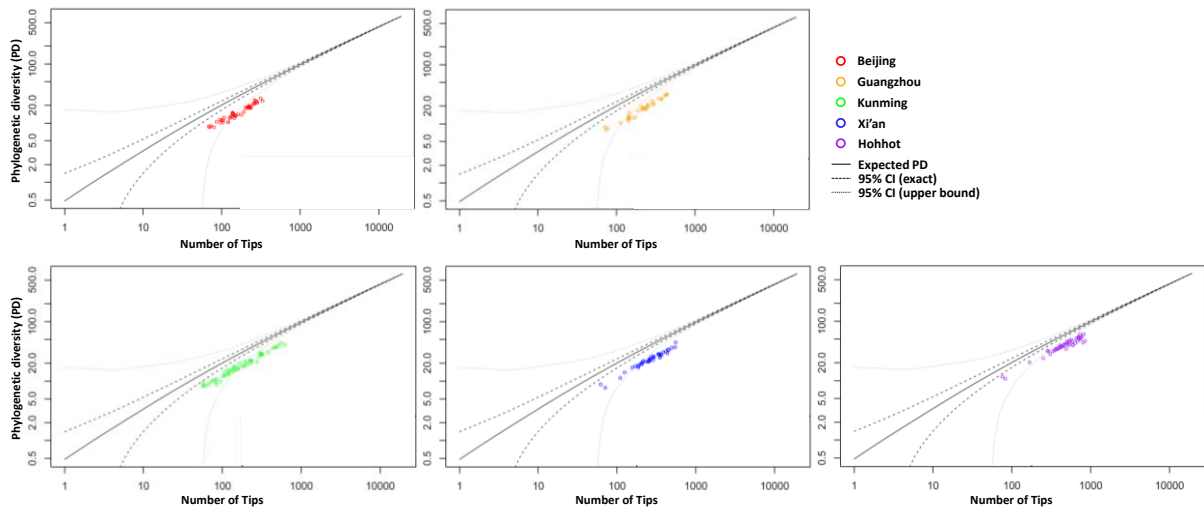

**fig. S7. Distribution of PD.** The distribution of the actual phylogenetic diversity (PD) values in five cities compared to the expected PD values shows the community assembly characteristics of the skin microbiota in each region. Solid lines represent the expected PD, the first dashed lines represent the lower bound of the 95% confidence interval, and the second dashed lines represent the upper bound of the 95% confidence interval computed using the variance of the sampled PDs.





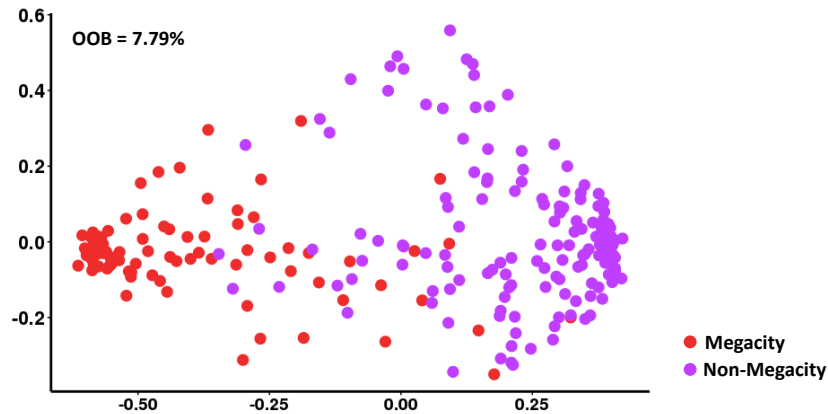

**fig. S9. Comparison of predicted functional metagenomic profiling using PICRUST between the megacity and non-megacity groups.** The Nearest Sequenced Taxon Index (NSTI) was calculated for assessing the accuracy of PICRUST, and the NSTI score of our data was  $0.056 \pm 0.016$ . An NSTI value below 0.06 generally means that the closely related reference genomes were applicable to the dataset. A multidimensional plot of the proximity matrix was calculated using random forest analysis of the PICRUST results (out-of-box error rate = 7.79%, ntree = 100), showing a significant difference between the two groups.

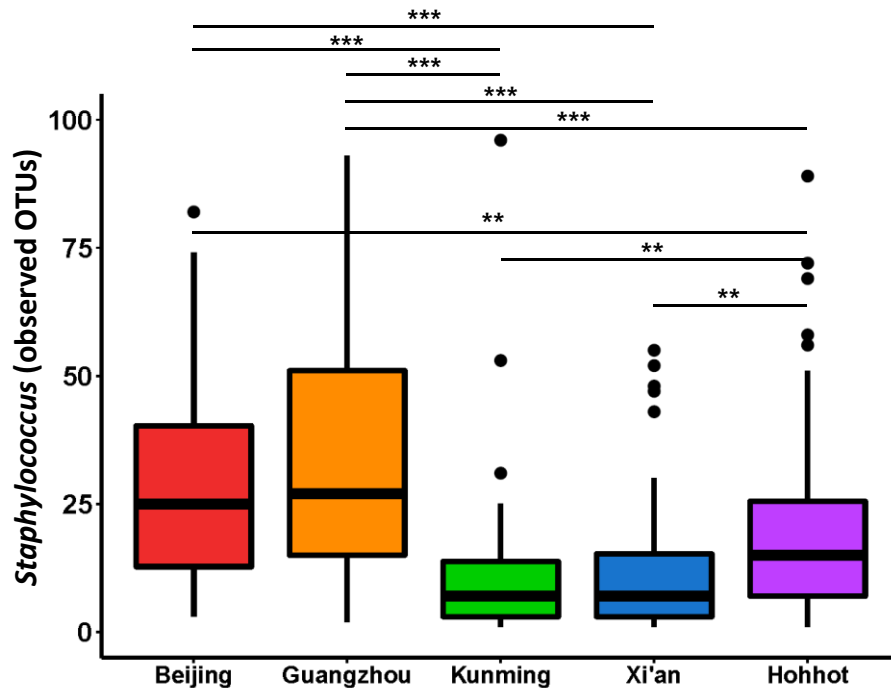

**fig. S10. The richness (observed OTUs) of the genus *Staphylococcus* in five cities.** On each graph, an asterisk indicates a significant difference (\*\* $P < 0.01$ , \*  $P < 0.05$ , Wilcoxon rank sum test).

**table S1. Sample metadata, number of sequences, and  $\alpha$  diversity across samples based on rarefaction of 4860 reads per sample.**

| Sample | Location | Age | Married childbirth       | Moisture (A.U) | Oil (A.U) | pH   | TEWL (g/m <sup>2</sup> h) | Horny Substance | Skin Type   | Occupation | Number of sequences | Number of OTUs | Chao1  | PD whole tree |
|--------|----------|-----|--------------------------|----------------|-----------|------|---------------------------|-----------------|-------------|------------|---------------------|----------------|--------|---------------|
| Bei.01 | Beijing  | 35  | Married with children    | 54.80          | 9         | 5.95 | 22.67                     | 15.2            | nomal       | Working    | 25524               | 184            | 445.1  | 21.9          |
| Bei.02 | Beijing  | 34  | Married without children | 43.97          | 2         | 5.43 | 34.53                     | 16.6            | NA          | Working    | 29200               | 327            | 703.0  | 35.6          |
| Bei.03 | Beijing  | 34  | Married with children    | 69.97          | 7         | 5.66 | 20.27                     | 13.8            | dry         | Working    | 30137               | 274            | 594.8  | 30.4          |
| Bei.04 | Beijing  | 35  | Married with children    | 44.27          | 19        | 5.89 | 29.73                     | 15.6            | dry         | Working    | 29995               | 119            | 518.0  | 17.7          |
| Bei.05 | Beijing  | 35  | Married with children    | 63.17          | 11        | 5.64 | 22.13                     | 15.2            | nomal       | Housewife  | 33924               | 235            | 497.6  | 27.0          |
| Bei.06 | Beijing  | 34  | Married without children | 58.20          | 19        | 5.43 | 29.43                     | 15.5            | nomal       | Working    | 30572               | 124            | 352.8  | 16.3          |
| Bei.07 | Beijing  | 32  | Married without children | 54.80          | 15        | 5.12 | 20.13                     | 14.9            | nomal       | Working    | 26984               | 301            | 815.1  | 32.2          |
| Bei.08 | Beijing  | 35  | Married with children    | 54.17          | 5         | 5.96 | 17.8                      | 17.2            | dry         | Working    | 37907               | 279            | 1035.1 | 34.7          |
| Bei.09 | Beijing  | 35  | Married with children    | 47.53          | 1         | 5.85 | 23.23                     | 15.2            | dry         | Working    | 33725               | 239            | 632.9  | 26.5          |
| Bei.10 | Beijing  | 25  | Unmarried                | 66.20          | 13        | 5.92 | 27.1                      | 20.5            | nomal       | Working    | 33265               | 159            | 436.5  | 19.9          |
| Bei.11 | Beijing  | 34  | Married with children    | 56.20          | 11        | 5.63 | 15.97                     | 20.8            | dry         | Working    | 36735               | 309            | 1104.0 | 32.5          |
| Bei.12 | Beijing  | 26  | Unmarried                | 60.93          | 19        | 5.66 | 22.67                     | 16              | combination | Working    | 33649               | 134            | 279.5  | 18.4          |
| Bei.13 | Beijing  | 28  | Unmarried                | 53.07          | 22        | 6.37 | 18.53                     | 18.1            | combination | Working    | 30526               | 205            | 488.6  | 24.2          |
| Bei.14 | Beijing  | 28  | Married with children    | 39.73          | 0         | 6.07 | 27.23                     | 19.4            | nomal       | Working    | 42935               | 340            | 1226.2 | 37.2          |
| Bei.15 | Beijing  | 33  | Married with children    | 66.93          | 21        | 7.03 | 21.7                      | 18.7            | nomal       | Working    | 40901               | 336            | 877.8  | 32.4          |
| Bei.16 | Beijing  | 35  | Married with children    | 78.53          | 21        | 6.90 | 27.73                     | 15.3            | nomal       | Housewife  | 24596               | 223            | 521.5  | 27.1          |
| Bei.17 | Beijing  | 26  | Married without children | 63.73          | 3         | 6.86 | 18.93                     | 14.7            | nomal       | Working    | 31406               | 71             | 211.3  | 11.1          |
| Bei.18 | Beijing  | 25  | Unmarried                | 42.50          | 11        | 6.59 | 25.23                     | 17.6            | dry         | Working    | 32636               | 137            | 230.9  | 16.8          |
| Bei.19 | Beijing  | 25  | Unmarried                | 54.00          | 29        | 6.88 | 22.57                     | 16.5            | dry         | Working    | 21564               | 68             | 134.4  | 11.5          |
| Bei.20 | Beijing  | 25  | Unmarried                | 64.27          | 20        | 7.04 | 23.73                     | 22.3            | dry         | Working    | 23654               | 110            | 218.1  | 13.0          |
| Bei.21 | Beijing  | 25  | Unmarried                | 62.97          | 17        | 6.75 | 29.2                      | 16.3            | dry         | Working    | 22766               | 290            | 678.3  | 33.2          |
| Bei.22 | Beijing  | 31  | Married with children    | 50.80          | 11        | 6.94 | 22.9                      | 14.8            | nomal       | Working    | 31123               | 159            | 807.0  | 21.3          |
| Bei.23 | Beijing  | 35  | Married with children    | 44.37          | 4         | 7.04 | 25.8                      | 18.3            | dry         | Working    | 36963               | 235            | 593.0  | 25.2          |
| Bei.24 | Beijing  | 30  | Married without children | 56.97          | 8         | 6.67 | 25.5                      | 18.2            | oily        | Working    | 35400               | 184            | 500.9  | 17.3          |
| Bei.25 | Beijing  | 35  | Married with children    | 33.67          | 21        | 6.86 | 20.1                      | 17.6            | dry         | Working    | 47779               | 320            | 833.0  | 33.1          |
| Bei.26 | Beijing  | 25  | Unmarried                | 49.73          | 10        | 6.91 | 14.4                      | 21.3            | nomal       | Working    | 23496               | 123            | 336.3  | 13.7          |
| Bei.27 | Beijing  | 25  | Unmarried                | 39.50          | 12        | 6.87 | 19.33                     | 26.3            | nomal       | Working    | 28078               | 160            | 520.0  | 20.5          |
| Bei.28 | Beijing  | 35  | Married with children    | 52.27          | 21        | 6.90 | 21.03                     | 17.4            | dry         | Working    | 12944               | 227            | 548.0  | 25.9          |
| Bei.29 | Beijing  | 34  | Married with children    | 54.03          | 14        | 6.77 | 20.7                      | 19.4            | dry         | Working    | 28958               | 157            | 476.5  | 20.3          |
| Bei.30 | Beijing  | 25  | Unmarried                | 67.47          | 13        | 6.95 | 17.1                      | 16.6            | nomal       | Working    | 32794               | 88             | 211.0  | 11.6          |
| Bei.31 | Beijing  | 26  | Unmarried                | 45.77          | 23        | 6.77 | 18.63                     | 19.9            | nomal       | Working    | 33077               | 94             | 206.9  | 15.1          |
| Bei.32 | Beijing  | 33  | Married without children | 49.67          | 31        | 6.82 | 28.67                     | 16              | oily        | Working    | 31565               | 229            | 956.2  | 25.9          |
| Bei.33 | Beijing  | 26  | Unmarried                | 49.93          | 39        | 6.72 | 36.3                      | 15.4            | oily        | Working    | 42672               | 240            | 616.9  | 26.5          |
| Bei.34 | Beijing  | 32  | Married without children | 68.50          | 15        | 6.44 | 25.33                     | 21.2            | dry         | Working    | 38999               | 188            | 1076.0 | 18.8          |
| Bei.35 | Beijing  | 27  | Unmarried                | 35.63          | 12        | 6.75 | 26.4                      | 15.6            | dry         | Working    | 33544               | 81             | 471.0  | 13.5          |
| Bei.36 | Beijing  | 25  | Unmarried                | 29.80          | 5         | 6.78 | 24.5                      | 16.7            | nomal       | Working    | 33089               | 135            | 231.3  | 18.6          |
| Bei.37 | Beijing  | 31  | Married without children | 76.87          | 9         | 6.53 | 14.97                     | 19.5            | nomal       | Working    | 41716               | 242            | 605.1  | 27.8          |
| Bei.38 | Beijing  | 27  | Unmarried                | 52.23          | 5         | 6.78 | 15.93                     | 18              | nomal       | Working    | 22586               | 204            | 477.2  | 23.7          |
| Bei.39 | Beijing  | 27  | Married without children | 62.30          | 28        | 6.75 | 27.13                     | 15.1            | nomal       | Working    | 33381               | 106            | 272.5  | 17.5          |
| Bei.40 | Beijing  | 35  | Married without children | 40.07          | 8         | 6.91 | 16.4                      | 21              | oily        | Working    | 23692               | 147            | 391.4  | 20.1          |
| Bei.41 | Beijing  | 35  | Married without children | 42.57          | 1         | 7.05 | 25.3                      | 16.6            | dry         | Working    | 24439               | 211            | 1565.7 | 20.9          |
| Bei.42 | Beijing  | 34  | Married with children    | 59.30          | 21        | 6.83 | 22.23                     | 16.9            | dry         | Working    | 35693               | 148            | 435.3  | 21.1          |
| Bei.43 | Beijing  | 34  | Married without children | 60.93          | 4         | 5.25 | 21.5                      | 15              | dry         | Working    | 22815               | 150            | 369.0  | 18.2          |
| Bei.44 | Beijing  | 34  | Married without children | 44.83          | 35        | 5.78 | 38.1                      | 21.1            | oily        | Working    | 16864               | 120            | 390.1  | 17.4          |
| Bei.45 | Beijing  | 35  | Married with children    | 45.13          | 20        | 5.69 | 16.87                     | 17.1            | dry         | Working    | 37619               | 280            | 739.0  | 34.6          |
| Bei.46 | Beijing  | 25  | Unmarried                | 56.13          | 11        | 6.47 | 24.7                      | 21.1            | dry         | Working    | 32540               | 90             | 206.3  | 15.2          |
| Bei.47 | Beijing  | 33  | Married without children | 54.97          | 30        | 6.21 | 32.27                     | 14.1            | dry         | Working    | 39109               | 215            | 565.2  | 26.0          |
| Bei.48 | Beijing  | 25  | Unmarried                | 39.73          | 18        | 5.80 | 19.03                     | 17.5            | dry         | Working    | 36759               | 152            | 371.0  | 16.5          |
| Bei.49 | Beijing  | 33  | Unmarried                | 51.97          | 21        | 6.32 | 48.87                     | 16.6            | dry         | Working    | 18666               | 105            | 321.2  | 15.7          |
| Bei.50 | Beijing  | 26  | Unmarried                | 67.13          | 26        | 6.11 | 14.3                      | 16.7            | nomal       | Working    | 9483                | 151            | 308.9  | 19.2          |

table S1. - continued.

| Sample   | Location  | Age | Married childbirth       | Moisture (A.U) | Oil (A.U) | pH   | TEWL (g/m <sup>2</sup> h) | Horny Substance | Skin Type   | Occupation | Number of sequences | Number of OTUs | Chao1  | PD whole tree |
|----------|-----------|-----|--------------------------|----------------|-----------|------|---------------------------|-----------------|-------------|------------|---------------------|----------------|--------|---------------|
| Guang.01 | Guangzhou | 31  | Married without children | 38.67          | 0         | 5.84 | 20.67                     | 20.7            | normal      | Working    | 42480               | 236            | 549.8  | 27.4          |
| Guang.02 | Guangzhou | 32  | Married without children | 49.13          | 4         | 5.79 | 18.67                     | 19.8            | normal      | Working    | 12403               | 130            | 275.5  | 18.5          |
| Guang.03 | Guangzhou | 31  | Unmarried                | 61.07          | 33        | 5.30 | 15.03                     | 18.5            | oily        | Working    | 54957               | 386            | 849.8  | 41.0          |
| Guang.04 | Guangzhou | 26  | Unmarried                | 34.90          | 11        | 5.63 | 29.17                     | 17.9            | dry         | Working    | 23817               | 180            | 626.3  | 18.8          |
| Guang.05 | Guangzhou | 28  | Unmarried                | 53.60          | 21        | 5.72 | 23.73                     | 21.5            | combination | Working    | 17125               | 143            | 269.4  | 20.5          |
| Guang.06 | Guangzhou | 35  | Married with children    | 36.73          | 23        | 5.80 | 47.13                     | 15.8            | dry         | Working    | 8023                | 80             | 150.1  | 12.4          |
| Guang.07 | Guangzhou | 35  | Married with children    | 61.77          | 5         | 5.85 | 13.67                     | 16              | normal      | Working    | 42314               | 277            | 694.3  | 35.5          |
| Guang.08 | Guangzhou | 32  | Married without children | 49.53          | 7         | 5.98 | 15.43                     | 14.3            | normal      | Working    | 42908               | 278            | 602.3  | 31.0          |
| Guang.09 | Guangzhou | 29  | Married with children    | 42.53          | 8         | 6.15 | 19.33                     | 18.5            | combination | Working    | 51439               | 459            | 1075.9 | 47.9          |
| Guang.10 | Guangzhou | 34  | Married with children    | 73.13          | 32        | 5.70 | 14.43                     | 19.8            | normal      | Working    | 40223               | 278            | 600.3  | 28.4          |
| Guang.11 | Guangzhou | 34  | Married with children    | 52.53          | 33        | 5.98 | 20.1                      | 20.8            | combination | Working    | 50922               | 392            | 952.3  | 40.8          |
| Guang.12 | Guangzhou | 28  | Unmarried                | 52.43          | 4         | 5.74 | 12.07                     | 21.6            | normal      | Working    | 20668               | 160            | 791.3  | 16.5          |
| Guang.13 | Guangzhou | 29  | Married without children | 55.80          | 19        | 5.62 | 20.67                     | 18.4            | dry         | Working    | 42051               | 153            | 348.5  | 19.3          |
| Guang.14 | Guangzhou | 34  | Married with children    | 35.90          | 3         | 6.72 | 27.47                     | 22.5            | dry         | Working    | 23169               | 180            | 1445.6 | 19.6          |
| Guang.15 | Guangzhou | 35  | Married with children    | 62.63          | 0         | 5.66 | 21.23                     | 18.5            | dry         | Housewife  | 29987               | 312            | 721.9  | 32.6          |
| Guang.16 | Guangzhou | 32  | Married without children | 44.80          | 4         | 5.36 | 17.17                     | 19.9            | normal      | Working    | 40980               | 445            | 1199.7 | 43.7          |
| Guang.17 | Guangzhou | 31  | Married with children    | 40.80          | 4         | 6.23 | 21.63                     | 24.3            | dry         | Working    | 28854               | 237            | 640.3  | 30.1          |
| Guang.18 | Guangzhou | 28  | Unmarried                | 64.70          | 1         | 5.98 | 14.43                     | 18.7            | normal      | Working    | 22855               | 254            | 641.5  | 29.1          |
| Guang.19 | Guangzhou | 32  | Married with children    | 61.87          | 33        | 5.43 | 15.5                      | 22.1            | normal      | Working    | 34431               | 159            | 313.1  | 20.2          |
| Guang.20 | Guangzhou | 33  | Married without children | 49.10          | 23        | 5.51 | 28.9                      | 16.4            | normal      | Working    | 42886               | 307            | 734.7  | 33.9          |
| Guang.21 | Guangzhou | 35  | Married with children    | 31.27          | 17        | 5.36 | 17.53                     | 21.2            | normal      | Working    | 32956               | 310            | 557.6  | 33.3          |
| Guang.22 | Guangzhou | 29  | Married without children | 17.43          | 10        | 5.76 | 22.27                     | 22.3            | normal      | Working    | 54649               | 183            | 310.5  | 25.5          |
| Guang.23 | Guangzhou | 33  | Married with children    | 40.27          | 13        | 4.24 | 14.67                     | 22.4            | normal      | Working    | 31566               | 231            | 546.5  | 29.1          |
| Guang.24 | Guangzhou | 27  | Unmarried                | 26.87          | 2         | 5.96 | 25.33                     | 18.7            | normal      | Working    | 22739               | 274            | 648.2  | 31.9          |
| Guang.25 | Guangzhou | 29  | Unmarried                | 53.67          | 3         | 5.52 | 14.57                     | 19              | normal      | Working    | 28141               | 157            | 476.5  | 23.5          |
| Guang.26 | Guangzhou | 27  | Married without children | 52.07          | 4         | 5.83 | 22.4                      | 17.5            | normal      | Working    | 2560                | n/a            | n/a    | n/a           |
| Guang.27 | Guangzhou | 31  | Married without children | 58.47          | 2         | 5.44 | 19.7                      | 19.8            | dry         | Working    | 43698               | 389            | 924.9  | 41.6          |
| Guang.28 | Guangzhou | 29  | Married without children | 68.83          | 26        | 5.42 | 21.3                      | 18.5            | dry         | Working    | 32832               | 230            | 557.2  | 27.2          |
| Guang.29 | Guangzhou | 30  | Unmarried                | 62.27          | 9         | 6.21 | 28.33                     | 18.5            | dry         | Working    | 22568               | 79             | 266.0  | 11.8          |
| Guang.30 | Guangzhou | 34  | Married with children    | 69.37          | 14        | 5.58 | 15                        | 14.4            | normal      | Working    | 18383               | 152            | 407.6  | 21.8          |
| Guang.31 | Guangzhou | 27  | Unmarried                | 30.33          | 2         | 6.27 | 13.33                     | 22.3            | normal      | Working    | 39629               | 442            | 874.7  | 43.6          |
| Guang.32 | Guangzhou | 32  | Married with children    | 51.30          | 10        | 6.18 | 26.9                      | 16.1            | normal      | Working    | 28276               | 80             | 290.0  | 11.9          |
| Guang.33 | Guangzhou | 25  | Married without children | 61.43          | 11        | 5.96 | 19.2                      | 17.6            | normal      | Working    | 32096               | 241            | 537.0  | 28.4          |

table S1. - continued.

| Sample | Location | Age | Married childbirth       | Moisture (A.U) | Oil (A.U) | pH   | TEWL (g/m <sup>2</sup> h) | Horny Substance | Skin Type    | Occupation | Number of sequences | Number of OTUs | Chao1  | PD whole tree |
|--------|----------|-----|--------------------------|----------------|-----------|------|---------------------------|-----------------|--------------|------------|---------------------|----------------|--------|---------------|
| Kun.01 | Kunming  | 29  | Married with children    | 35.23          | 11        | 6.20 | 32.47                     | 30.7            | combination  | Housewife  | 76954               | 269            | 444.5  | 31.5          |
| Kun.02 | Kunming  | 30  | Married with children    | 41.93          | 12        | 5.69 | 22.1                      | 26.8            | combination  | others     | 12447               | 241            | 531.1  | 32.2          |
| Kun.03 | Kunming  | 32  | Married with children    | 23.30          | 3         | 6.45 | 48.33                     | 27.3            | dry          | Working    | 12063               | 504            | 1515.1 | 52.8          |
| Kun.04 | Kunming  | 26  | Unmarried                | 35.60          | 10        | 6.40 | 16.93                     | 30.3            | dry          | Working    | 12072               | 582            | 1550.0 | 59.3          |
| Kun.05 | Kunming  | 25  | Unmarried                | 54.17          | 17        | 6.08 | 27.97                     | 27.6            | nomal        | Working    | 10753               | 537            | 1203.5 | 54.5          |
| Kun.06 | Kunming  | 26  | Unmarried                | 39.43          | 9         | 6.03 | 22.43                     | 27.4            | combination  | Working    | 12353               | 268            | 435.2  | 35.8          |
| Kun.07 | Kunming  | 29  | Married without children | 67.73          | 23        | 6.27 | 58.4                      | 27.7            | combination  | Working    | 10748               | 349            | 623.2  | 39.8          |
| Kun.08 | Kunming  | 25  | Married without children | 54.17          | 16        | 5.31 | 17.97                     | 25.1            | combination  | Working    | 6305                | 94             | 109.0  | 15.3          |
| Kun.09 | Kunming  | 28  | Married with children    | 47.77          | 14        | 6.36 | 56.53                     | 27.3            | dry          | Working    | 20913               | 248            | 635.6  | 28.0          |
| Kun.10 | Kunming  | 35  | Married with children    | 53.60          | 5         | 6.43 | 21.53                     | 27.2            | combination  | others     | 13952               | 682            | 1586.5 | 58.2          |
| Kun.11 | Kunming  | 28  | Unmarried                | 64.83          | 11        | 5.45 | 21.23                     | 26.7            | nomal        | Working    | 13706               | 305            | 671.2  | 38.2          |
| Kun.12 | Kunming  | 32  | Married without children | 66.80          | 8         | 6.05 | 22.57                     | 29.2            | combination  | Working    | 25258               | 153            | 196.6  | 21.5          |
| Kun.13 | Kunming  | 25  | Unmarried                | 37.03          | 4         | 6.46 | 21.23                     | 29.8            | combination  | Working    | 10704               | 549            | 1125.6 | 56.4          |
| Kun.14 | Kunming  | 25  | Unmarried                | 52.53          | 4         | 6.23 | 28.43                     | 27.4            | nomal        | Working    | 24938               | 159            | 197.8  | 21.9          |
| Kun.15 | Kunming  | 35  | Married with children    | 48.80          | 13        | 6.18 | 23.13                     | 28.5            | combination  | Working    | 33098               | 82             | 112.6  | 15.4          |
| Kun.16 | Kunming  | 33  | Married with children    | 54.20          | 19        | 6.19 | 23.03                     | 27.6            | combination  | Working    | 8165                | 315            | 619.3  | 41.9          |
| Kun.17 | Kunming  | 28  | Married with children    | 56.40          | 6         | 6.36 | 28.03                     | 25.8            | combination  | Working    | 36919               | 138            | 169.2  | 21.4          |
| Kun.18 | Kunming  | 27  | Married without children | 52.07          | 26        | 6.24 | 29.1                      | 26              | combination  | Working    | 12575               | 168            | 336.1  | 24.4          |
| Kun.19 | Kunming  | 25  | Unmarried                | 27.03          | 5         | 6.24 | 20.33                     | 26.4            | dry          | Student    | 3014                | n/a            | n/a    | n/a           |
| Kun.20 | Kunming  | 30  | Unmarried                | 58.30          | 5         | 6.21 | 24.1                      | 29.1            | combination  | Working    | 20750               | 185            | 472.6  | 28.6          |
| Kun.21 | Kunming  | 35  | Married without children | 74.00          | 3         | 6.39 | 19.07                     | 28.8            | combination  | Working    | 16016               | 427            | 1441.5 | 42.6          |
| Kun.22 | Kunming  | 28  | Married without children | 37.00          | 3         | 6.14 | 23.2                      | 29.1            | nomal        | Working    | 17622               | 368            | 1059.7 | 43.8          |
| Kun.23 | Kunming  | 25  | Unmarried                | 67.93          | 26        | 6.31 | 35.1                      | 23.6            | nomal        | Working    | 14821               | 205            | 421.2  | 24.8          |
| Kun.24 | Kunming  | 33  | Unmarried                | 50.50          | 7         | 6.24 | 16.47                     | 28.4            | combination  | Working    | 13723               | 166            | 180.9  | 25.8          |
| Kun.25 | Kunming  | 25  | Unmarried                | 63.83          | 11        | 6.18 | 27.13                     | 25.4            | oily         | Working    | 31388               | 151            | 355.4  | 18.3          |
| Kun.26 | Kunming  | 33  | Married with children    | 53.13          | 7         | 6.14 | 20.87                     | 28.3            | nomal        | Working    | 4981                | n/a            | n/a    | n/a           |
| Kun.27 | Kunming  | 25  | Unmarried                | 28.43          | 4         | 6.13 | 19.67                     | 26.6            | combination  | Working    | 36100               | 175            | 318.0  | 22.0          |
| Kun.28 | Kunming  | 30  | Unmarried                | 54.73          | 7         | 6.10 | 24.07                     | 24.9            | combination  | Working    | 21891               | 70             | 122.5  | 12.1          |
| Kun.29 | Kunming  | 27  | Unmarried                | 55.00          | 3         | 6.04 | 25.77                     | 25.6            | dry          | Working    | 30717               | 85             | 132.1  | 11.1          |
| Kun.30 | Kunming  | 35  | Married with children    | 51.37          | 4         | 6.35 | 27.5                      | 26.3            | dry          | Working    | 26778               | 90             | 136.4  | 11.5          |
| Kun.31 | Kunming  | 26  | Unmarried                | 53.37          | 2         | 6.37 | 38.73                     | 24.3            | oily         | Working    | 16958               | 68             | 113.3  | 10.4          |
| Kun.32 | Kunming  | 28  | Married with children    | 50.13          | 11        | 6.53 | 21.97                     | 26.5            | combination  | Working    | 59541               | 212            | 279.2  | 27.6          |
| Kun.33 | Kunming  | 35  | Married with children    | 49.17          | 4         | 6.88 | 24.33                     | 24.5            | dry          | Working    | 13391               | 256            | 464.4  | 31.5          |
| Kun.34 | Kunming  | 26  | Unmarried                | 67.73          | 27        | 6.02 | 28.23                     | 25              | combination  | Working    | 8991                | 527            | 1039.8 | 53.9          |
| Kun.35 | Kunming  | 25  | Unmarried                | 56.73          | 7         | 6.42 | 20.83                     | 24.9            | combination  | Unemployed | 22236               | 179            | 237.2  | 23.5          |
| Kun.36 | Kunming  | 28  | Married with children    | 63.63          | 3         | 6.11 | 38                        | 25.2            | combination  | Working    | 37283               | 172            | 249.2  | 24.8          |
| Kun.37 | Kunming  | 25  | Unmarried                | 54.70          | 22        | 6.18 | 25.7                      | 23              | combination  | Student    | 9660                | 168            | 358.4  | 25.6          |
| Kun.38 | Kunming  | 28  | Married with children    | 44.50          | 15        | 5.98 | 35.2                      | 24.9            | dry          | Housewife  | 34396               | 73             | 84.0   | 11.3          |
| Kun.39 | Kunming  | 32  | Married with children    | 49.87          | 29        | 6.10 | 39.53                     | 23.1            | combination  | Working    | 31607               | 113            | 141.9  | 18.8          |
| Kun.40 | Kunming  | 25  | Unmarried                | 53.63          | 15        | 6.34 | 29.23                     | 23.2            | combination  | Working    | 3870                | n/a            | n/a    | n/a           |
| Kun.41 | Kunming  | 25  | Unmarried                | 61.83          | 2         | 5.81 | 30                        | 27.2            | dry          | Working    | 3449                | n/a            | n/a    | n/a           |
| Kun.42 | Kunming  | 25  | Unmarried                | 64.93          | 34        | 6.23 | 34.67                     |                 | oily         | Working    | 18148               | 112            | 211.2  | 13.9          |
| Kun.43 | Kunming  | 25  | Unmarried                | 52.23          | 3         | 6.15 | 27.93                     | 27.5            | extremly_dry | Working    | 13326               | 109            | 125.5  | 18.0          |
| Kun.44 | Kunming  | 35  | Married with children    | 63.67          | 4         | 6.34 | 20.53                     | 25.1            | combination  | Working    | 18162               | 93             | 165.5  | 14.7          |
| Kun.45 | Kunming  | 33  | Married with children    | 49.57          | 11        | 6.10 | 20.57                     | 25.4            | nomal        | Working    | 18040               | 309            | 501.6  | 30.0          |
| Kun.46 | Kunming  | 25  | Unmarried                | 49.63          | 2         | 6.16 | 32.5                      | 23.7            | combination  | Working    | 15923               | 105            | 124.3  | 18.0          |
| Kun.47 | Kunming  | 33  | Unmarried                | 43.10          | 10        | 6.23 | 25.03                     | 28.2            | nomal        | Working    | 20095               | 90             | 132.2  | 14.8          |
| Kun.48 | Kunming  | 32  | Married without children | 49.13          | 6         | 5.99 | 15.2                      | 27              | dry          | Working    | 6940                | 354            | 729.9  | 41.0          |
| Kun.49 | Kunming  | 28  | Unmarried                | 48.53          | 3         | 6.17 | 24.33                     | 27.5            | dry          | Working    | 9752                | 153            | 196.0  | 20.5          |
| Kun.50 | Kunming  | 26  | Married without children | 60.17          | 4         | 6.24 | 43.83                     | 27.8            | combination  | Working    | 29321               | 160            | 274.0  | 21.6          |

table S1. - continued.

| Sample | Location | Age | Married childbirth       | Moisture (A.U) | Oil (A.U) | pH   | TEWL (g/m <sup>2</sup> h) | Horny Substance | Skin Type     | Occupation | Number of sequences | Number of OTUs | Chao1  | PD whole tree |
|--------|----------|-----|--------------------------|----------------|-----------|------|---------------------------|-----------------|---------------|------------|---------------------|----------------|--------|---------------|
| Xi.01  | Xian     | 35  | Married with children    | 47.73          | 30        | 5.72 | 19.3                      | 14.3            | oily          | Working    | 20169               | 291            | 693.8  | 34.9          |
| Xi.02  | Xian     | 27  | Unmarried                | 51.17          | 41        | 6.16 | 20.33                     | 16              | dry           | Working    | 21653               | 486            | 1189.3 | 50.9          |
| Xi.03  | Xian     | 27  | Unmarried                | 42.10          | 0         | 5.97 | 24.33                     | 18              | combination   | Working    | 15456               | 326            | 527.0  | 39.6          |
| Xi.04  | Xian     | 25  | Unmarried                | 57.97          | 31        | 5.66 | 26.47                     | 15.9            | nomal         | Working    | 19435               | 277            | 499.0  | 34.3          |
| Xi.05  | Xian     | 28  | Married with children    | 56.03          | 0         | 5.55 | 26.53                     | 14.8            | nomal         | Working    | 25722               | 171            | 192.1  | 25.1          |
| Xi.06  | Xian     | 35  | Married with children    | 49.43          | 4         | 5.86 | 29                        | 17.6            | nomal         | Working    | 18086               | 228            | 345.6  | 30.2          |
| Xi.07  | Xian     | 27  | Married with children    | 59.80          | 8         | 5.74 | 34.17                     | 12.6            | dry           | Working    | 2556                | n/a            | n/a    | n/a           |
| Xi.08  | Xian     | 25  | Unmarried                | 64.10          | 3         | 6.07 | 35.27                     | 13.1            | nomal         | Working    | 16295               | 274            | 512.0  | 33.8          |
| Xi.09  | Xian     | 30  | Married with children    | 47.40          | 36        | 5.88 | 21.63                     | 19.8            | combination   | Working    | 18167               | 121            | 146.0  | 18.8          |
| Xi.10  | Xian     | 26  | Unmarried                | 63.53          | 5         | 5.59 | 32.4                      | 15.8            | dry           | Working    | 4177                | n/a            | n/a    | n/a           |
| Xi.11  | Xian     | 30  | Married with children    | 66.63          | 0         | 5.94 | 19.2                      | 17.1            | combination   | Housewife  | 14441               | 408            | 917.5  | 42.3          |
| Xi.12  | Xian     | 32  | Married without children | 42.07          | 1         | 6.05 | 25.2                      | 13.1            | dry           | Unemployed | 33031               | 157            | 337.6  | 20.5          |
| Xi.13  | Xian     | 30  | Married with children    | 48.37          | 4         | 5.78 | 33.87                     | 14.1            | dry           | Working    | 19374               | 245            | 490.2  | 33.6          |
| Xi.15  | Xian     | 25  | Married with children    | 54.17          | 3         | 6.16 | 23.63                     | 16.9            | combination   | others     | 2979                | n/a            | n/a    | n/a           |
| Xi.16  | Xian     | 32  | Married with children    | 45.40          | 9         | 6.07 | 29.5                      | 21.2            | dry           | Working    | 11240               | 455            | 953.2  | 49.6          |
| Xi.17  | Xian     | 34  | Married with children    | 48.50          | 0         | 6.33 | 23                        | 17.7            | combination   | Working    | 9135                | 398            | 707.8  | 44.9          |
| Xi.18  | Xian     | 31  | Married with children    | 24.60          | 4         | 6.36 | 27.37                     | 22.9            | oily          | Working    | 886                 | n/a            | n/a    | n/a           |
| Xi.20  | Xian     | 25  | Unmarried                | 43.10          | 0         | 6.33 | 21.1                      | 18.3            | dry           | Working    | 15257               | 491            | 842.4  | 47.5          |
| Xi.21  | Xian     | 26  | Unmarried                | 51.03          | 13        | 6.06 | 27.07                     | 19.4            | oily          | Working    | 25735               | 68             | 87.5   | 14.6          |
| Xi.22  | Xian     | 31  | Married with children    | 38.17          | 0         | 5.76 | 21.33                     | 19.1            | combination   | Working    | 20359               | 373            | 637.7  | 40.1          |
| Xi.23  | Xian     | 31  | Married with children    | 30.33          | 0         | 6.05 | 33.4                      | 17.1            | combination   | Working    | 15266               | 389            | 783.5  | 44.7          |
| Xi.24  | Xian     | 32  | Married with children    | 49.03          | 5         | 6.12 | 22.8                      | 21              | combination   | Working    | 32843               | 216            | 8092.5 | 11.3          |
| Xi.25  | Xian     | 29  | Married without children | 35.93          | 22        | 5.94 | 24.6                      | 18.1            | nomal         | Working    | 22870               | 297            | 517.5  | 39.6          |
| Xi.26  | Xian     | 25  | Unmarried                | 39.47          | 6         | 5.88 | 28.67                     | 17.8            | dry           | Student    | 14820               | 368            | 688.3  | 45.4          |
| Xi.27  | Xian     | 25  | Unmarried                | 41.60          | 5         | 6.35 | 29.2                      | 19.1            | oily          | Student    | 11829               | 248            | 376.6  | 33.2          |
| Xi.28  | Xian     | 35  | Married with children    | 46.90          | 5         | 6.36 | 37.73                     | 17.5            | dry           | Working    | 15261               | 220            | 400.8  | 31.8          |
| Xi.29  | Xian     | 35  | Married with children    | 42.90          | 2         | 5.99 | 16.93                     | 20.6            | oily          | Housewife  | 13100               | 414            | 781.6  | 48.0          |
| Xi.30  | Xian     | 28  | Married without children | 50.07          | 6         | 6.10 | 35.27                     | 20              | nomal         | Working    | 11181               | 179            | 302.5  | 25.8          |
| Xi.31  | Xian     | 25  | Unmarried                | 49.07          | 11        | 6.07 | 17.77                     | 17.2            | oily          | Working    | 15702               | 465            | 858.8  | 52.2          |
| Xi.32  | Xian     | 28  | Unmarried                | 53.87          | 3         | 6.22 | 32.73                     | 17.1            | combination   | Working    | 13103               | 221            | 408.0  | 31.4          |
| Xi.33  | Xian     | 25  | Unmarried                | 35.90          | 2         | 6.13 | 27.33                     | 23.2            | combination   | Working    | 2511                | n/a            | n/a    | n/a           |
| Xi.34  | Xian     | 25  | Unmarried                | 30.00          | 5         | 6.26 | 29.27                     | 20.8            | extremely_dry | Working    | 2238                | n/a            | n/a    | n/a           |
| Xi.35  | Xian     | 28  | Unmarried                | 37.63          | 18        | 6.98 | 23.3                      | 20.6            | combination   | Working    | 9176                | 219            | 342.7  | 31.0          |
| Xi.36  | Xian     | 25  | Unmarried                | 40.13          | 25        | 5.98 | 34.53                     | 15.4            | dry           | Working    | 20317               | 192            | 463.6  | 27.2          |
| Xi.37  | Xian     | 31  | Married with children    | 29.43          | 6         | 6.15 | 22.97                     | 20.5            | combination   | Working    | 21330               | 272            | 556.2  | 35.1          |
| Xi.38  | Xian     | 35  | Married with children    | 52.40          | 2         | 5.95 | 30.57                     | 21.4            | dry           | Working    | 1762                | n/a            | n/a    | n/a           |
| Xi.39  | Xian     | 32  | Married without children | 41.23          | 3         | 5.85 | 28                        | 20.5            | combination   | Working    | 25512               | 292            | 404.2  | 37.8          |
| Xi.40  | Xian     | 32  | Married with children    | 49.43          | 5         | 6.05 | 18.9                      | 20              | dry           | Working    | 26725               | 433            | 1295.5 | 43.2          |
| Xi.41  | Xian     | 32  | Married with children    | 57.60          | 2         | 5.56 | 18.63                     | 20.4            | nomal         | Working    | 1587                | n/a            | n/a    | n/a           |
| Xi.42  | Xian     | 27  | Unmarried                | 65.20          | 2         | 5.74 | 29.43                     | 16.2            | dry           | Working    | 15746               | 600            | 1044.4 | 65.5          |
| Xi.43  | Xian     | 31  | Unmarried                | 41.67          | 5         | 5.97 | 25.83                     | 21.7            | combination   | Working    | 11140               | 369            | 587.2  | 42.9          |
| Xi.44  | Xian     | 28  | Married with children    | 39.53          | 20        | 6.16 | 25.7                      | 18.2            | combination   | Working    | 13152               | 298            | 700.1  | 39.0          |
| Xi.45  | Xian     | 28  | Unmarried                | 52.63          | 3         | 6.77 | 26.47                     | 15.8            | nomal         | Working    | 33104               | 282            | 399.8  | 35.8          |
| Xi.46  | Xian     | 27  | Married with children    | 25.77          | 17        | 6.00 | 19.97                     | 18.7            | nomal         | Housewife  | 12841               | 314            | 682.2  | 34.7          |
| Xi.47  | Xian     | 26  | Married with children    | 67.30          | 2         | 5.72 | 16.8                      | 21.4            | dry           | Working    | 12232               | 511            | 665.8  | 52.3          |
| Xi.48  | Xian     | 25  | Unmarried                | 50.67          | 0         | 6.12 | 16.5                      | 18.3            | dry           | Working    | 22429               | 219            | 576.5  | 26.5          |
| Xi.49  | Xian     | 27  | Unmarried                | 61.53          | 13        | 6.20 | 30.7                      | 19.4            | nomal         | Working    | 22739               | 314            | 769.0  | 38.3          |
| Xi.50  | Xian     | 34  | Married with children    | 72.00          | 8         | 6.25 | 20                        | 22.1            | dry           | Working    | 18548               | 609            | 1571.5 | 56.6          |

table S1. - continued.

| Sample | Location | Age | Married childbirth       | Moisture (A.U) | Oil (A.U) | pH   | TEWL (g/m <sup>2</sup> h) | Horny Substance | Skin Type     | Occupation | Number of sequences | Number of OTUs | Chao1  | PD whole tree |
|--------|----------|-----|--------------------------|----------------|-----------|------|---------------------------|-----------------|---------------|------------|---------------------|----------------|--------|---------------|
| Ho.01  | Hohhot   | 29  | Unmarried                | 29.83          | 8         | 5.89 | 23.43                     | 24.2            | combination   | Working    | 18887               | 83             | 128.5  | 16.1          |
| Ho.02  | Hohhot   | 35  | Married with children    | 43.57          | 51        | 6.14 | 18.83                     | 18              | oily          | others     | 15353               | 734            | 2562.1 | 71.6          |
| Ho.03  | Hohhot   | 25  | Married without children | 36.03          | 12        | 6.29 | 23.43                     | 18.7            | combination   | Student    | 11167               | 744            | 1979.1 | 63.3          |
| Ho.04  | Hohhot   | 25  | Unmarried                | 37.07          | 0         | 6.27 | 26.93                     | 18.3            | combination   | Working    | 29250               | 853            | 3105.9 | 56.0          |
| Ho.05  | Hohhot   | 26  | Unmarried                | 55.10          | 13        | 6.29 | 16.03                     | 21.5            | dry           | Working    | 30089               | 362            | 886.3  | 45.1          |
| Ho.06  | Hohhot   | 35  | Married with children    | 50.90          | 0         | 6.42 | 21.8                      | 17.7            | combination   | Working    | 18669               | 725            | 1594.1 | 67.6          |
| Ho.07  | Hohhot   | 35  | Married with children    | 44.07          | 0         | 5.95 | 14.1                      | 18.7            | dry           | Working    | 12907               | 480            | 784.5  | 52.3          |
| Ho.08  | Hohhot   | 33  | Unmarried                | 49.83          | 5         | 6.57 | 38.63                     | 22.3            | nomal         | Working    | 11977               | 340            | 1172.5 | 39.7          |
| Ho.09  | Hohhot   | 25  | Unmarried                | 41.87          | 6         | 6.73 | 23.47                     | 22.5            | combination   | Unemployed | 21727               | 745            | 2085.1 | 48.0          |
| Ho.10  | Hohhot   | 33  | Unmarried                | 23.90          | 8         | 6.49 | 30.6                      | 20              | combination   | Working    | 13459               | 433            | 743.1  | 51.6          |
| Ho.11  | Hohhot   | 30  | Unmarried                | 22.97          | 0         | 6.36 | 30.13                     | 23.8            | dry           | Working    | 8184                | 361            | 506.0  | 40.8          |
| Ho.12  | Hohhot   | 31  | Married without children | 58.90          | 0         | 6.35 | 18.4                      | 18.5            | dry           | Working    | 23167               | 737            | 2092.9 | 64.4          |
| Ho.13  | Hohhot   | 35  | Married with children    | 53.00          | 2         | 6.42 | 24.5                      | 20.8            | nomal         | Working    | 18717               | 578            | 1470.8 | 56.9          |
| Ho.14  | Hohhot   | 27  | Married with children    | 59.30          | 20        | 5.94 | 23.4                      | 21.8            | combination   | Working    | 19404               | 612            | 2052.2 | 64.6          |
| Ho.15  | Hohhot   | 35  | Married with children    | 42.47          | 8         | 6.33 | 15.4                      | 24.1            | dry           | Working    | 25213               | 763            | 2018.2 | 76.9          |
| Ho.16  | Hohhot   | 35  | Married with children    | 31.27          | 1         | 6.38 | 16.6                      | 24.9            | dry           | Working    | 29830               | 773            | 2897.8 | 71.6          |
| Ho.17  | Hohhot   | 25  | Unmarried                | 19.00          | 5         | 6.27 | 38.57                     | 26.2            | dry           | Working    | 20992               | 539            | 1002.7 | 57.2          |
| Ho.18  | Hohhot   | 31  | Married with children    | 53.27          | 8         | 6.78 | 15.2                      | 19.3            | nomal         | Working    | 19496               | 466            | 1100.1 | 50.2          |
| Ho.19  | Hohhot   | 25  | Unmarried                | 42.60          | 13        | 6.43 | 28.03                     | 20.4            | combination   | Working    | 14396               | 431            | 1031.8 | 49.1          |
| Ho.20  | Hohhot   | 26  | Unmarried                | 29.30          | 13        | 6.34 | 35.03                     | 18.7            | combination   | Working    | 13496               | 272            | 740.0  | 39.1          |
| Ho.21  | Hohhot   | 26  | Unmarried                | 48.63          | 0         | 5.71 | 17.5                      | 20              | combination   | Working    | 1795                | n/a            | n/a    | n/a           |
| Ho.22  | Hohhot   | 31  | Married with children    | 55.53          | 0         | 6.50 | 18.9                      | 25.3            | dry           | Working    | 10119               | 593            | 1622.9 | 51.1          |
| Ho.23  | Hohhot   | 25  | Unmarried                | 42.03          | 13        | 6.53 | 20.77                     | 30.1            | oily          | Working    | 12083               | 312            | 534.0  | 36.3          |
| Ho.24  | Hohhot   | 25  | Unmarried                | 53.40          | 0         | 6.35 | 25.7                      | 22.9            | nomal         | Working    | 16241               | 454            | 822.4  | 50.7          |
| Ho.25  | Hohhot   | 33  | Married with children    | 29.87          | 0         | 6.83 | 18.2                      | 22              | combination   | Housewife  | 12884               | 565            | 1200.7 | 58.9          |
| Ho.26  | Hohhot   | 35  | Married with children    | 24.57          | 0         | 6.39 | 33.1                      | 20.1            | oily          | Working    | 10211               | 385            | 762.4  | 48.1          |
| Ho.27  | Hohhot   | 35  | Married with children    | 37.67          | 3         | 6.07 | 25.17                     | 23.4            | oily          | others     | 16608               | 487            | 1283.1 | 55.8          |
| Ho.28  | Hohhot   | 35  | Married with children    | 44.80          | 0         | 5.85 | 17.9                      | 17.8            | nomal         | Unemployed | 19772               | 757            | 2237.2 | 69.0          |
| Ho.29  | Hohhot   | 26  | Unmarried                | 52.00          | 0         | 6.55 | 21.1                      | 19.5            | extremely_dry | Student    | 31249               | 179            | 265.0  | 25.7          |
| Ho.30  | Hohhot   | 26  | Unmarried                | 54.40          | 3         | 6.44 | 17.3                      | 22.1            | oily          | Student    | 16464               | 550            | 1004.3 | 53.8          |
| Ho.31  | Hohhot   | 26  | Unmarried                | 32.60          | 0         | 6.30 | 20.97                     | 22.4            | nomal         | Student    | 17316               | 394            | 771.1  | 44.9          |
| Ho.32  | Hohhot   | 35  | Unmarried                | 42.07          | 1         | 5.97 | 57.3                      | 21.8            | combination   | Working    | 6612                | 670            | 1681.9 | 66.3          |
| Ho.33  | Hohhot   | 26  | Unmarried                | 51.33          | 28        | 6.51 | 26.63                     | 19.7            | nomal         | Working    | 13530               | 596            | 1538.8 | 57.0          |
| Ho.34  | Hohhot   | 26  | Married without children | 55.80          | 21        | 6.48 | 19.87                     | 24.3            | dry           | Working    | 20119               | 477            | 1011.7 | 42.4          |
| Ho.35  | Hohhot   | 32  | Unmarried                | 51.53          | 9         | 6.59 | 31.4                      | 20.6            | combination   | Working    | 19110               | 658            | 1773.7 | 54.6          |
| Ho.36  | Hohhot   | 25  | Unmarried                | 28.87          | 9         | 6.46 | 23.33                     | 23.9            | combination   | Working    | 15508               | 573            | 1614.1 | 48.9          |
| Ho.37  | Hohhot   | 25  | Unmarried                | 52.60          | 20        | 6.93 | 37.7                      | 20.5            | oily          | Working    | 28046               | 295            | 597.9  | 35.3          |
| Ho.38  | Hohhot   | 25  | Unmarried                | 45.47          | 1         | 6.75 | 22.33                     | 27.3            | oily          | Working    | 9620                | 527            | 1028.7 | 55.3          |
| Ho.39  | Hohhot   | 26  | Unmarried                | 46.33          | 0         | 6.46 | 23.83                     | 20.7            | oily          | Student    | 11877               | 387            | 841.3  | 41.3          |
| Ho.40  | Hohhot   | 25  | Unmarried                | 48.43          | 28        | 6.32 | 17.23                     | 22.9            | combination   | Working    | 13817               | 446            | 892.3  | 47.8          |
| Ho.41  | Hohhot   | 26  | Unmarried                | 50.43          | 1         | 6.73 | 26.2                      | 22.2            | dry           | Student    | 20295               | 753            | 2601.5 | 69.7          |
| Ho.42  | Hohhot   | 25  | Unmarried                | 40.83          | 1         | 6.64 | 27.03                     | 21.3            | combination   | Working    | 21993               | 92             | 155.0  | 13.0          |
| Ho.43  | Hohhot   | 26  | Unmarried                | 11.03          | 4         | 6.47 | 36.23                     | 26.1            | combination   | Working    | 7891                | 288            | 501.3  | 38.7          |
| Ho.44  | Hohhot   | 26  | Unmarried                | 53.43          | 5         | 6.67 | 23.1                      | 19.6            | combination   | Working    | 4293                | n/a            | n/a    | n/a           |
| Ho.45  | Hohhot   | 26  | Unmarried                | 19.57          | 2         | 6.63 | 32.43                     | 19.5            | oily          | Working    | 18919               | 641            | 1673.8 | 65.0          |
| Ho.46  | Hohhot   | 25  | Unmarried                | 42.80          | 3         | 6.55 | 21.57                     | 23.7            | combination   | Working    | 16141               | 711            | 1992.6 | 55.1          |
| Ho.47  | Hohhot   | 25  | Unmarried                | 31.13          | 22        | 6.50 | 29.57                     | 27              | nomal         | Working    | 12132               | 445            | 1025.1 | 47.0          |
| Ho.48  | Hohhot   | 26  | Unmarried                | 36.90          | 65        | 6.29 | 35.7                      | 22.1            | combination   | Working    | 13886               | 512            | 1200.0 | 57.5          |
| Ho.49  | Hohhot   | 25  | Unmarried                | 54.33          | 12        | 6.72 | 18.33                     | 20.7            | combination   | Working    | 16512               | 442            | 713.6  | 49.8          |
| Ho.50  | Hohhot   | 26  | Unmarried                | 41.70          | 0         | 6.35 | 23.83                     | 19.9            | dry           | Working    | 16082               | 733            | 2019.3 | 67.3          |

**table S2. Relative average abundances of the 15 most abundant genera.**

| Genus                    | Relative abundance (%) |           |         |       |        |
|--------------------------|------------------------|-----------|---------|-------|--------|
|                          | Beijing                | Guangzhou | Kunming | Xi'an | Hohhot |
| <i>Propionibacterium</i> | 28.47                  | 27.05     | 15.95   | 11.7  | 11.97  |
| <i>Enhydrobacter</i>     | 3.05                   | 2.43      | 12.51   | 9.25  | 5.93   |
| <i>Chryseobacterium</i>  | 2.73                   | 1.14      | 10.26   | 13.67 | 3.71   |
| <i>Staphylococcus</i>    | 9.17                   | 9.43      | 4.51    | 4.64  | 4.84   |
| <i>Sphingomonas</i>      | 0.95                   | 1.11      | 15.07   | 5.89  | 2.77   |
| <i>Bacteroides</i>       | 0.08                   | 0         | 2.38    | 5.33  | 14.1   |
| <i>Corynebacterium</i>   | 5.09                   | 2.95      | 1.41    | 2.66  | 2.86   |
| <i>Streptococcus</i>     | 4.16                   | 3.82      | 1.52    | 1.9   | 1.12   |
| <i>Deinococcus</i>       | 0.75                   | 3.22      | 5.24    | 1.67  | 1.31   |
| <i>Acinetobacter</i>     | 1.95                   | 1.41      | 1.2     | 3.11  | 1.78   |
| <i>Faecalibacterium</i>  | 0.06                   | 0.01      | 1.01    | 1.46  | 4.5    |
| <i>Paracoccus</i>        | 1.66                   | 3.18      | 0.89    | 0.75  | 1.05   |
| <i>Neisseria</i>         | 1.29                   | 1.3       | 0.61    | 2.63  | 0.66   |
| <i>Micrococcus</i>       | 2.24                   | 1.53      | 0.88    | 1.02  | 0.74   |
| <i>Oscillospira</i>      | 0.01                   | 0         | 0.8     | 0.94  | 3.61   |

**table S3. Environmental factors and city indices of five cities.**

| Index | Sample ID |           |         |       |        |
|-------|-----------|-----------|---------|-------|--------|
|       | Beijing   | Guangzhou | Kunming | Xi'an | Hohhot |
| 1     | Buk.15    | Kwang.24  | Kun.22  | Xi.30 | Ne.46  |
| 2     | Buk.11    | Kwang.08  | Kun.21  | Xi.26 | Ne.09  |
| 3     | Buk.32    | Kwang.07  | Kun.01  | Xi.04 | Ne.28  |
| 4     | Buk.36    | Kwang.15  | Kun.48  | Xi.02 | Ne.35  |
| 5     | Buk.34    | Kwang.28  | Kun.03  | Xi.24 | Ne.16  |
| 6     | Buk.27    | Kwang.20  | Kun.11  | Xi.49 | Ne.04  |
| 7     | Buk.02    | Kwang.16  | Kun.05  | Xi.40 | Ne.12  |
| 8     | Buk.48    | Kwang.27  | Kun.04  | Xi.05 | Ne.50  |
| 9     | Buk.18    | Kwang.01  | Kun.32  | Xi.29 | Ne.03  |
| 10    | Buk.01    | Kwang.30  | Kun.46  | Xi.03 | Ne.30  |
| 11    | Buk.26    | Kwang.25  | Kun.34  | Xi.42 | Ne.22  |
| 12    | Buk.21    | Kwang.09  | Kun.45  | Xi.22 | Ne.10  |
| 13    | Buk.10    | Kwang.13  | Kun.50  | Xi.23 | Ne.13  |
| 14    | Buk.16    | Kwang.32  | Kun.44  | Xi.50 | Ne.24  |
| 15    | Buk.28    | Kwang.03  | Kun.09  | Xi.28 | Ne.48  |
| 16    | Buk.07    | Kwang.33  | Kun.25  | Xi.31 | Ne.41  |
| 17    | Buk.08    | Kwang.17  | Kun.24  | Xi.06 | Ne.15  |
| 18    | Buk.37    | Kwang.31  | Kun.27  | Xi.13 | Ne.14  |
| 19    | Buk.24    | Kwang.11  | Kun.06  | Xi.01 | Ne.02  |
| 20    | Buk.25    | Kwang.04  | Kun.16  | Xi.37 | Ne.25  |
| 21    | Buk.13    | Kwang.22  | Kun.13  | Xi.11 | Ne.05  |
| 22    | Buk.09    | Kwang.05  | Kun.17  | Xi.17 | Ne.11  |
| 23    | Buk.45    | Kwang.23  | Kun.10  | Xi.16 | Ne.27  |
| 24    | Buk.29    | Kwang.19  | Kun.37  | Xi.25 | Ne.45  |
| 25    | Buk.41    | Kwang.10  | Kun.43  | Xi.47 | Ne.38  |
| 26    | Buk.23    | Kwang.12  | Kun.07  | Xi.27 | Ne.26  |
| 27    | Buk.22    | Kwang.14  | Kun.02  | Xi.43 | Ne.17  |
| 28    | Buk.05    | Kwang.18  | Kun.20  | Xi.39 | Ne.18  |
| 29    | Buk.30    | Kwang.21  | Kun.18  | Xi.12 | Ne.06  |
| 30    | Buk.04    | Kwang.02  | Kun.23  | Xi.36 | Ne.36  |
| 31    | Buk.33    | Kwang.29  | Kun.33  | Xi.46 | Ne.47  |
| 32    | Buk.39    | Kwang.06  | Kun.12  | Xi.35 | Ne.34  |



**table S4. Environmental factors and city indices of five cities.**

| <b>Factors</b>                                                                                     | <b>Beijing</b> | <b>Guangzhou</b> | <b>Kunming</b> | <b>Xi'an</b> | <b>Hohhot</b> |
|----------------------------------------------------------------------------------------------------|----------------|------------------|----------------|--------------|---------------|
| <b>Atmospheric environment</b>                                                                     |                |                  |                |              |               |
| Annual Average Concentration of SO <sub>2</sub> (ug/m <sup>3</sup> )                               | 14             | 13               | 17             | 24           | 34            |
| Annual Average Concentration of NO <sub>2</sub> (ug/m <sup>3</sup> )                               | 50             | 47               | 30             | 44           | 39            |
| Annual Average Concentration of PM <sub>10</sub> (ug/m <sup>3</sup> )                              | 102            | 59               | 56             | 126          | 103           |
| Annual Average Concentration of PM <sub>(10-2.5)</sub> (ug/m <sup>3</sup> )                        | 21             | 20               | 26             | 68           | 60            |
| 95th Percentile Daily Average Concentration of CO (ug/m <sup>3</sup> )                             | 3.6            | 1.4              | 1.4            | 3.4          | 3.2           |
| 90th Percentile Daily Maximun 8 hours Average Concentration of O <sub>3</sub> (ug/m <sup>3</sup> ) | 203            | 145              | 110            | 145          | 145           |
| Annual Average Concentration of PM <sub>2.5</sub> (ug/m <sup>3</sup> )                             | 81             | 39               | 30             | 58           | 43            |
| Days of Air Quality Equal to or Above Grade II (day)                                               | 186            | 312              | 350            | 250          | 276           |
| Air Quality Index                                                                                  | 113.1          | 55.6             | 54.1           | 88.4         | 95            |
| <b>Climatic environment</b>                                                                        |                |                  |                |              |               |
| Temperature (°C)                                                                                   | 22             | 29               | 21             | 23           | 13            |
| Rain Days                                                                                          | 10             | 27               | 18             | 9            | 10            |
| Wind speed (mph)                                                                                   | 8.7            | 9.6              | 6              | 7.2          | 8.5           |
| Wind gust (mph)                                                                                    | 12.3           | 13.2             | 8.9            | 10.7         | 11.2          |
| Pressure (mb)                                                                                      | 1011.9         | 1011.2           | 1011.5         | 1015.5       | 1016.7        |
| Cloud (%)                                                                                          | 18             | 71               | 24             | 25           | 22            |
| Humidity (%)                                                                                       | 27             | 80               | 62             | 43           | 27            |
| UV Index (1~11)                                                                                    | 8              | 6                | 6              | 8            | 7             |
| Sun Hours (hr)                                                                                     | 142.3          | 50.8             | 116.3          | 108.3        | 124           |
| Sun Days                                                                                           | 21             | 2                | 10             | 22           | 19            |
| Visibility (km)                                                                                    | 9.8            | 8.7              | 9.3            | 9.7          | 9.7           |
| <b>City index</b>                                                                                  |                |                  |                |              |               |
| Population (million people)                                                                        | 21             | 14               | 6.5            | 8.3          | 2.8           |
| Density (population per km <sup>2</sup> )                                                          | 1289           | 1883             | 302            | 827          | 166           |
| GDP (billion dollar)                                                                               | 200            | 154              | 31             | 47           | 27            |
| Urbanization                                                                                       | 86             | 68               | 39             | 53           | 59            |

**table S5. The observed species pool of five cities.**

|                                                         | Beijing | Guangzhou | Kunming | Xi'an | Hohhot |
|---------------------------------------------------------|---------|-----------|---------|-------|--------|
| Observed species pool<br>( <sup>a</sup> number of OTUs) | 3499    | 4139      | 4260    | 4582  | 8039   |

<sup>a</sup> The observed species pool was calculated from randomly selected 32 samples and 19,712 OTUs, which was rarefied to 4860 reads per sample.

**data file S1. The information of OTUs in Fig. 3A.**
